# Supplementary material for: Two Novel Aspochalasins from the Gut Fungus Aspergillus sp. Z4
Source: PubMed Central journal article supplement (PMC6213381; doi:10.3390/md16100343), 2018-09-20
Supplement: marinedrugs-16-00343-s001.pdf [file marinedrugs-16-00343-s001.pdf]

# Two Novel Aspochalasins From the Gut Fungus *Aspergillus* sp. Z4

Xinyang Li <sup>1</sup>, Wanjing Ding <sup>1</sup>, Pinmei Wang <sup>1</sup> and Jinzhong Xu <sup>1,\*</sup>

<sup>1</sup> Institute of Marine Biology, Ocean College, Zhejiang University, Zhoushan 316021, China

\* Correspondence: [xujinzhong@zju.edu.cn](mailto:xujinzhong@zju.edu.cn); Tel.: +86 15858168018

## Contents

|                                                                                                                     |    |
|---------------------------------------------------------------------------------------------------------------------|----|
| <b>Figure S1.</b> The IR spectrum of compound <b>1</b> .....                                                        | 3  |
| <b>Figure S2.</b> The HR-ESI-MS spectrum of compound <b>1</b> .....                                                 | 3  |
| <b>Figure S3.</b> The HR-ESI-MS spectrum of compound <b>1</b> (expansion).....                                      | 4  |
| <b>Figure S4.</b> The <sup>1</sup> H-NMR spectrum of compound <b>1</b> in CDCl <sub>3</sub> .....                   | 4  |
| <b>Figure S5.</b> The <sup>13</sup> C-NMR spectrum of compound <b>1</b> in CDCl <sub>3</sub> .....                  | 5  |
| <b>Figure S6.</b> The DEPT spectrum of compound <b>1</b> in CDCl <sub>3</sub> .....                                 | 5  |
| <b>Figure S7.</b> The HSQC spectrum of compound <b>1</b> in CDCl <sub>3</sub> .....                                 | 6  |
| <b>Figure S8.</b> The <sup>1</sup> H- <sup>1</sup> H COSY spectrum of compound <b>1</b> in CDCl <sub>3</sub> .....  | 6  |
| <b>Figure S9.</b> The HMBC spectrum of compound <b>1</b> in CDCl <sub>3</sub> .....                                 | 7  |
| <b>Figure S10.</b> The NOESY spectrum of compound <b>1</b> in CDCl <sub>3</sub> .....                               | 7  |
| <b>Figure S11.</b> The <sup>1</sup> H spectrum of compound <b>1a</b> in pyridine- <i>d</i> <sub>5</sub> .....       | 8  |
| <b>Figure S12.</b> The <sup>1</sup> H spectrum of compound <b>1b</b> in pyridine- <i>d</i> <sub>5</sub> .....       | 8  |
| <b>Figure S13.</b> The IR spectrum of compound <b>2</b> .....                                                       | 9  |
| <b>Figure S14.</b> The HR-ESI-MS spectrum of compound <b>2</b> .....                                                | 9  |
| <b>Figure S15.</b> The HR-ESI-MS spectrum of compound <b>2</b> (expansion).....                                     | 10 |
| <b>Figure S16.</b> The <sup>1</sup> H-NMR spectrum of compound <b>2</b> in CDCl <sub>3</sub> .....                  | 10 |
| <b>Figure S17.</b> The <sup>13</sup> C-NMR spectrum of compound <b>2</b> in CDCl <sub>3</sub> .....                 | 11 |
| <b>Figure S18.</b> The DEPT spectrum of compound <b>2</b> in CDCl <sub>3</sub> .....                                | 11 |
| <b>Figure S19.</b> The HSQC spectrum of compound <b>2</b> in CDCl <sub>3</sub> .....                                | 12 |
| <b>Figure S20.</b> The <sup>1</sup> H- <sup>1</sup> H COSY spectrum of compound <b>2</b> in CDCl <sub>3</sub> ..... | 12 |
| <b>Figure S21.</b> The HMBC spectrum of compound <b>2</b> in CDCl <sub>3</sub> .....                                | 13 |
| <b>Figure S22.</b> The NOESY spectrum of compound <b>2</b> in CDCl <sub>3</sub> .....                               | 13 |
| <b>Figure S23.</b> The <sup>1</sup> H spectrum of compound <b>2a</b> in pyridine- <i>d</i> <sub>5</sub> .....       | 14 |
| <b>Figure S24.</b> The <sup>1</sup> H spectrum of compound <b>2b</b> in pyridine- <i>d</i> <sub>5</sub> .....       | 14 |
| <b>Figure S25.</b> The <sup>1</sup> H-NMR spectrum of compound <b>3</b> in CDCl <sub>3</sub> .....                  | 15 |
| <b>Figure S26.</b> The <sup>13</sup> C-NMR spectrum of compound <b>3</b> in CDCl <sub>3</sub> .....                 | 15 |
| <b>Figure S27.</b> The <sup>1</sup> H-NMR spectrum of compound <b>4</b> in CDCl <sub>3</sub> .....                  | 16 |
| <b>Figure S28.</b> The <sup>13</sup> C-NMR spectrum of compound <b>4</b> in CDCl <sub>3</sub> .....                 | 16 |
| <b>Figure S29.</b> The <sup>1</sup> H-NMR spectrum of compound <b>5</b> in CDCl <sub>3</sub> .....                  | 17 |
| <b>Figure S30.</b> The <sup>13</sup> C-NMR spectrum of compound <b>5</b> in CDCl <sub>3</sub> .....                 | 17 |

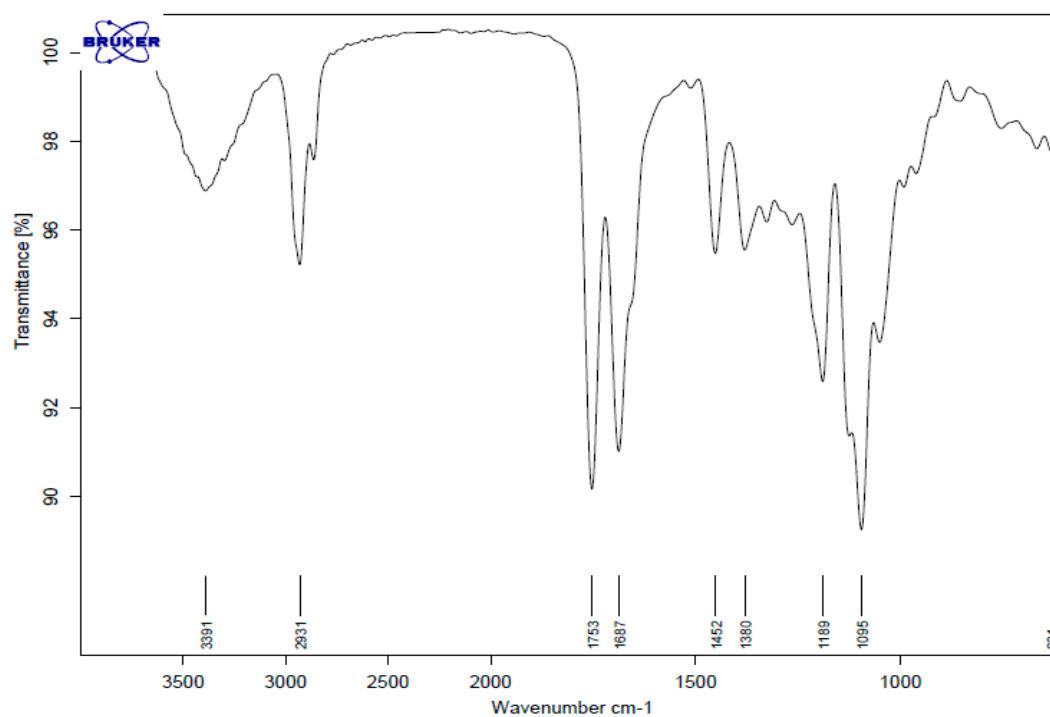

**Figure S1.** The IR spectrum of compound 1

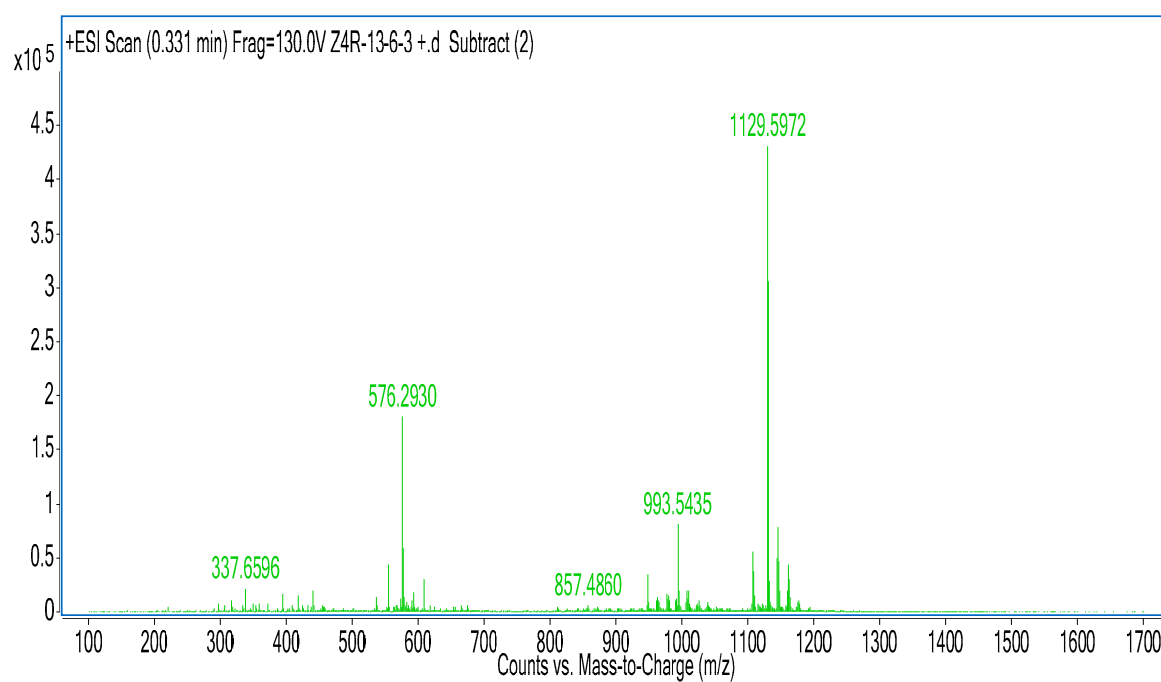

**Figure S2.** The HR-ESI-MS spectrum of compound 1

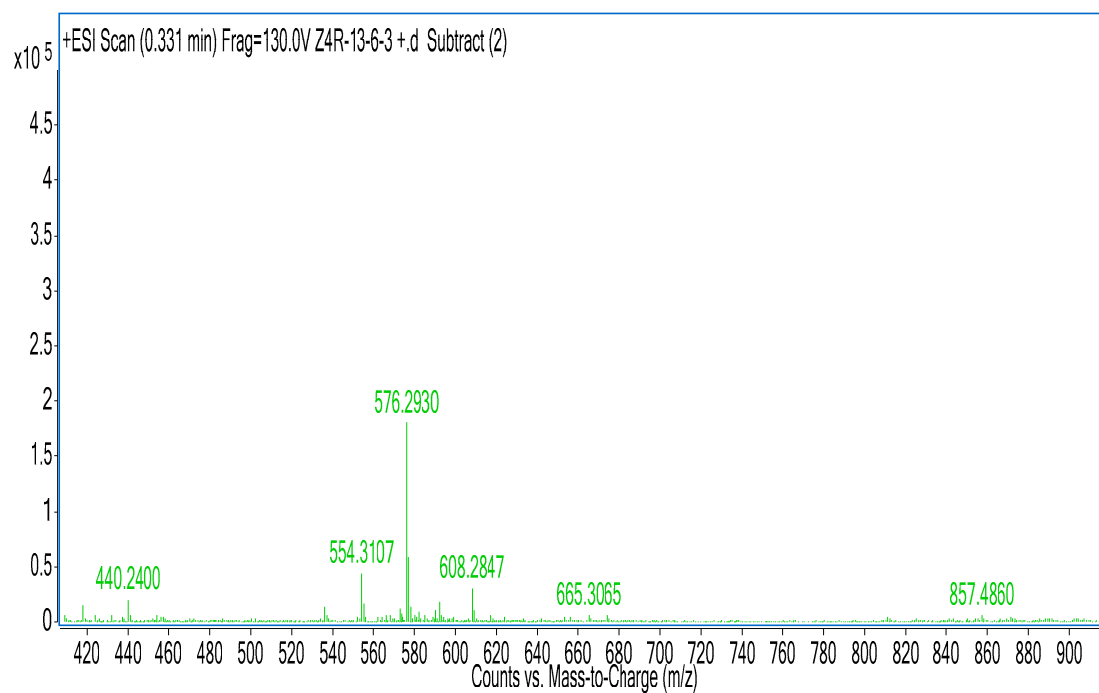

Figure S3. The HR-ESI-MS spectrum of compound 1 (expansion)

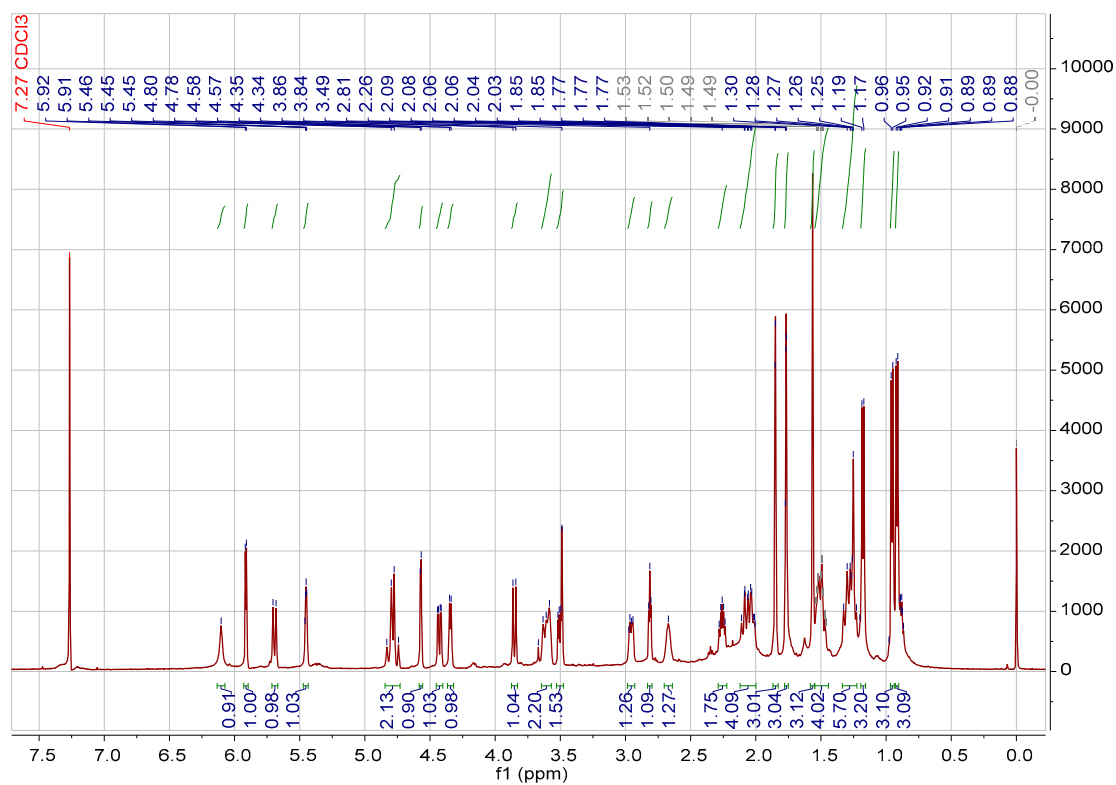

Figure S4. The <sup>1</sup>H-NMR spectrum of compound 1 in CDCl<sub>3</sub>

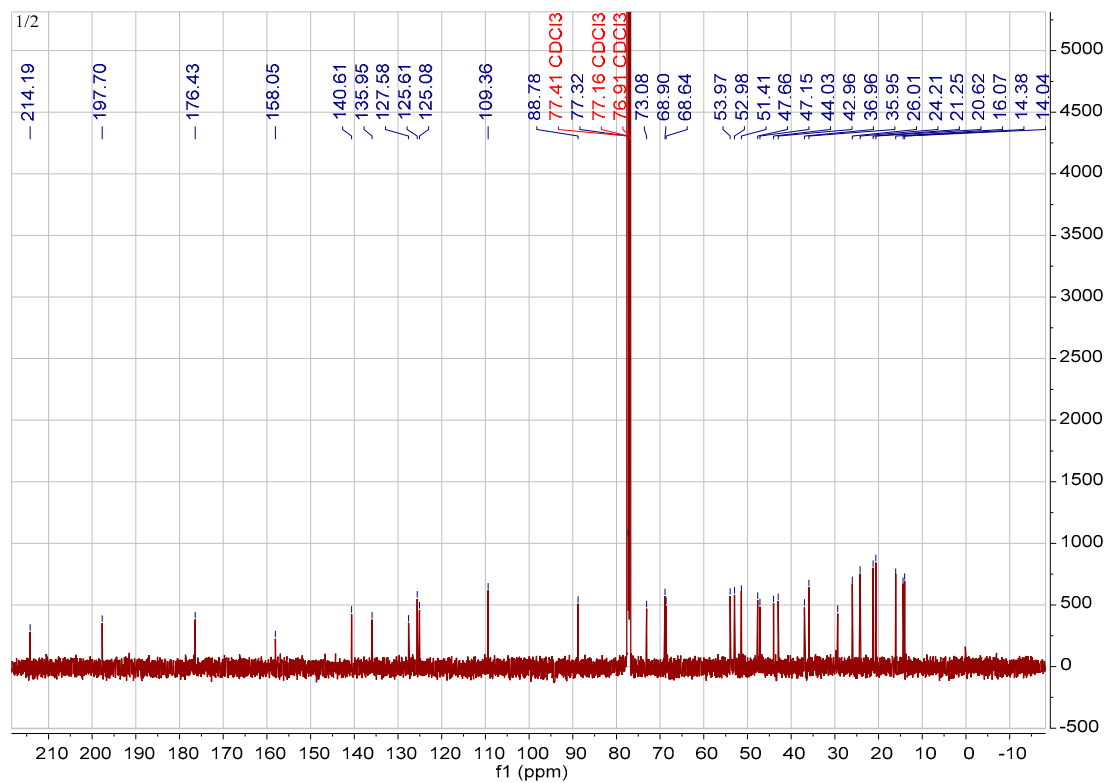

Figure S5. The <sup>13</sup>C-NMR spectrum of compound 1 in CDCl<sub>3</sub>

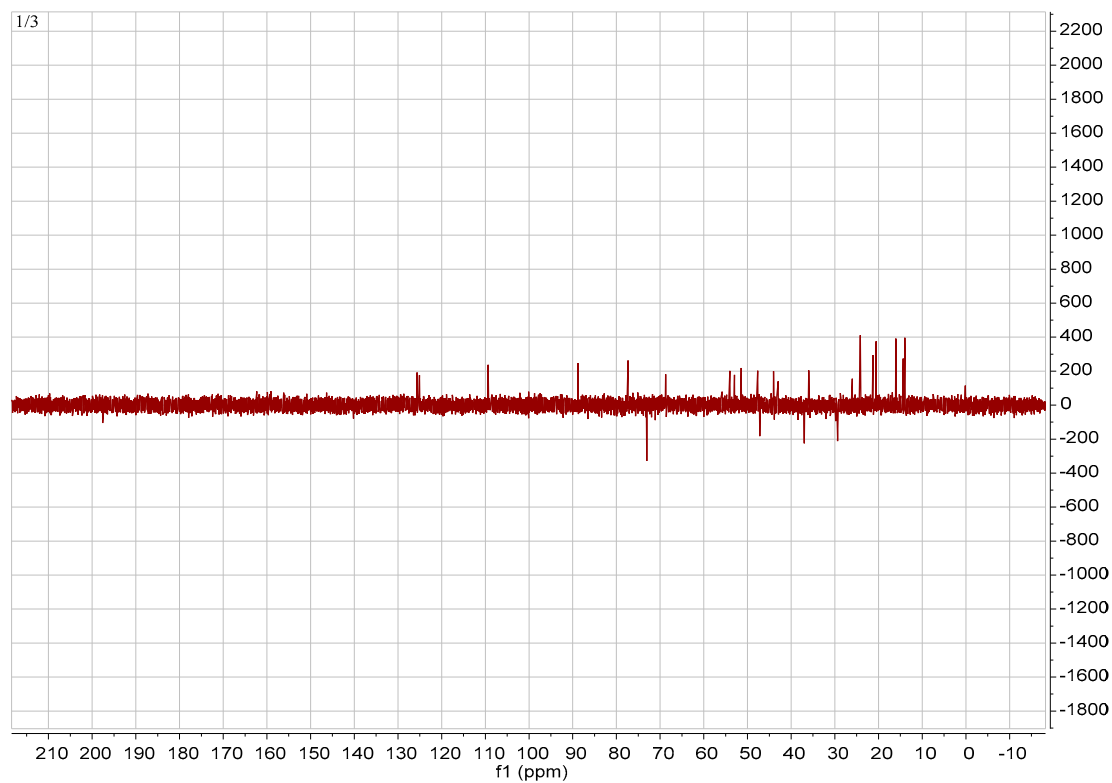

Figure S6. The DEPT spectrum of compound 1 in CDCl<sub>3</sub>

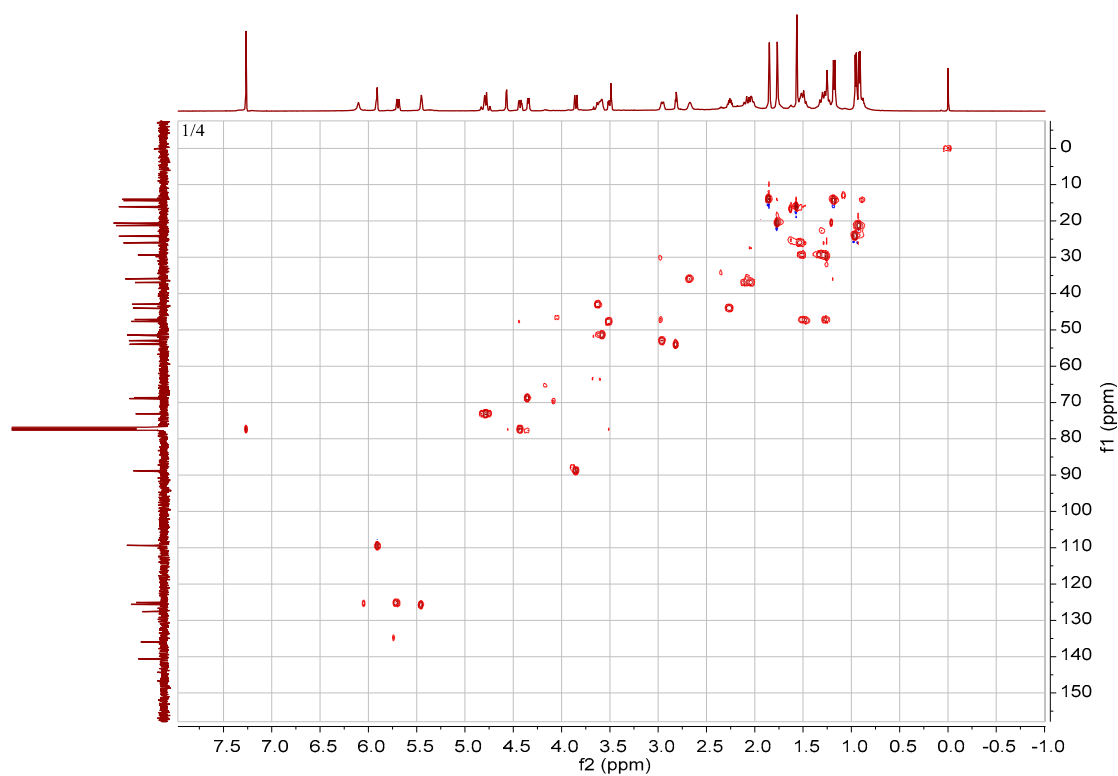

**Figure S7.** The HSQC spectrum of compound **1** in CDCl<sub>3</sub>

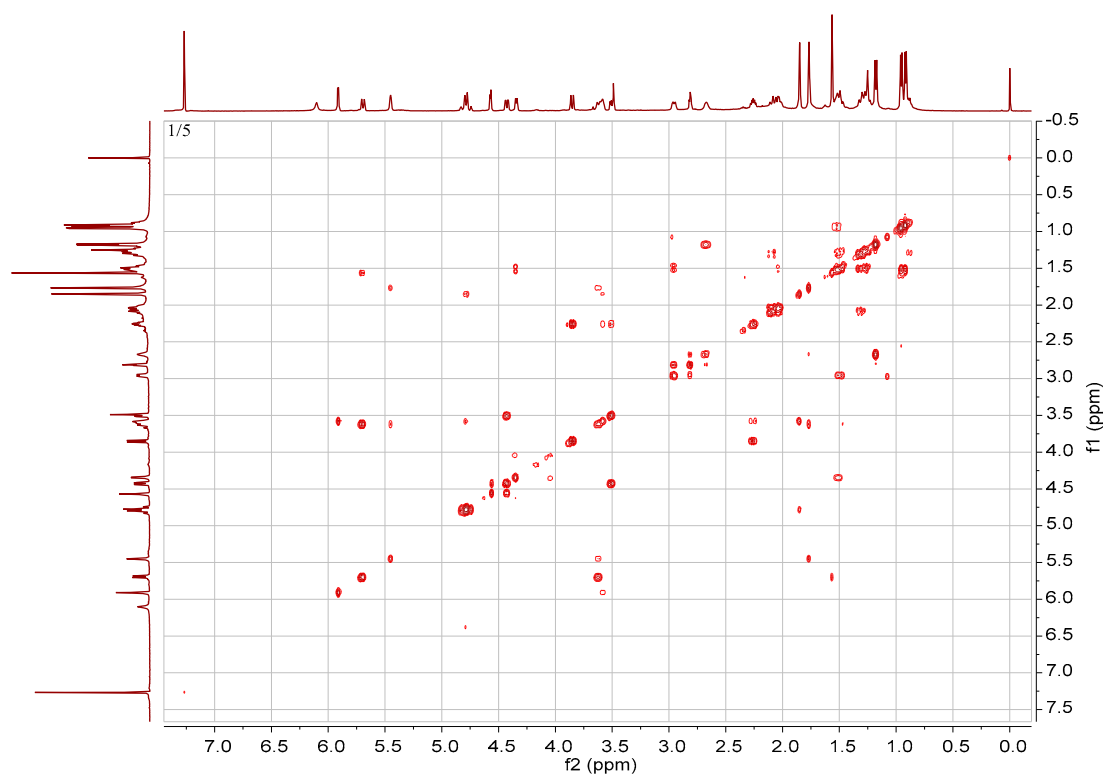

**Figure S8.** The <sup>1</sup>H-<sup>1</sup>H COSY spectrum of compound **1** in CDCl<sub>3</sub>

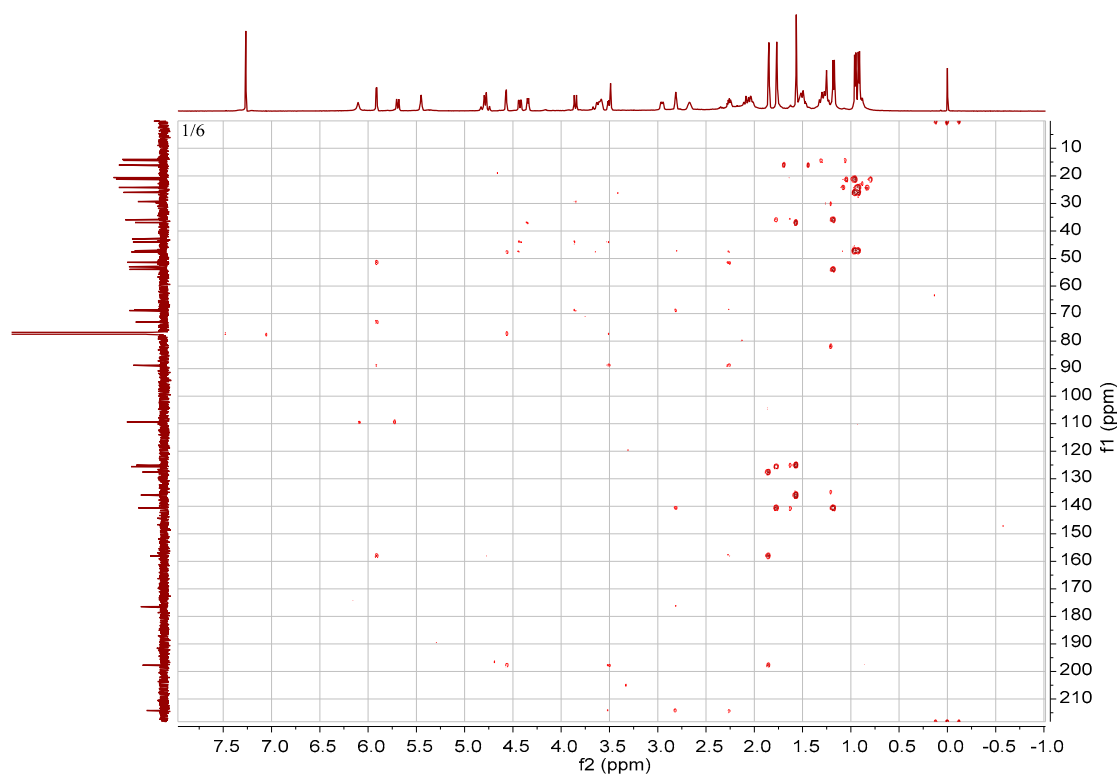

**Figure S9.** The HMBC spectrum of compound **1** in CDCl<sub>3</sub>

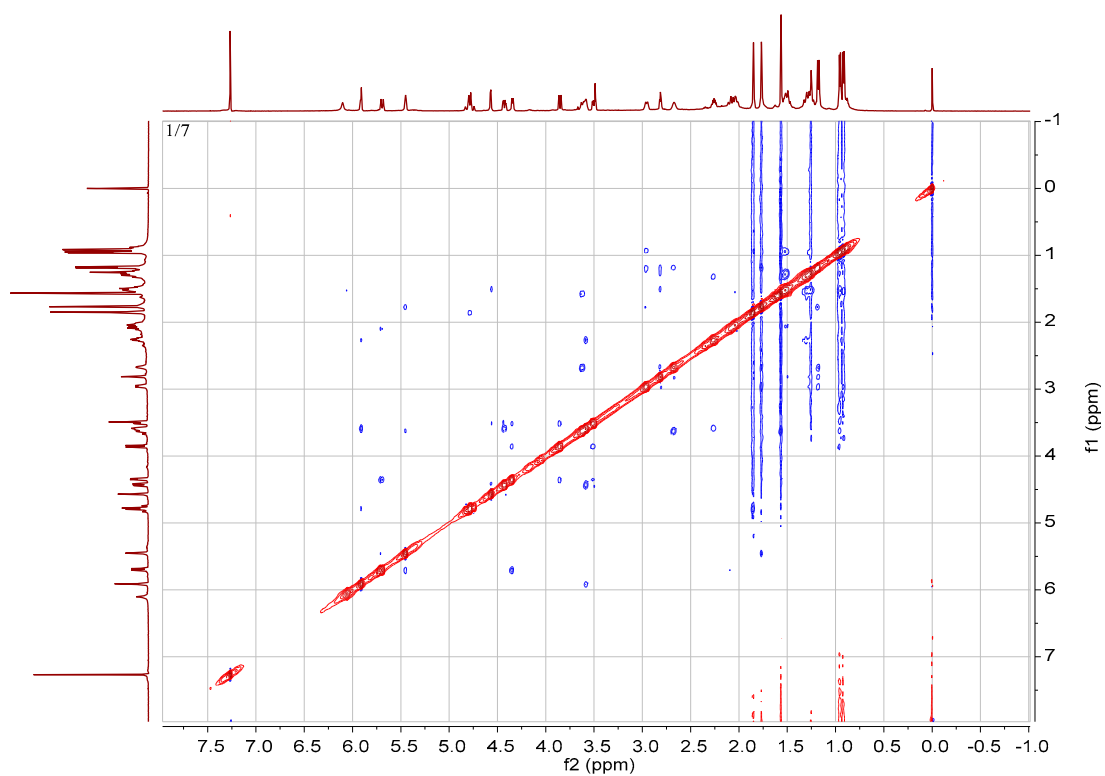

**Figure S10.** The NOESY spectrum of compound **1** in CDCl<sub>3</sub>

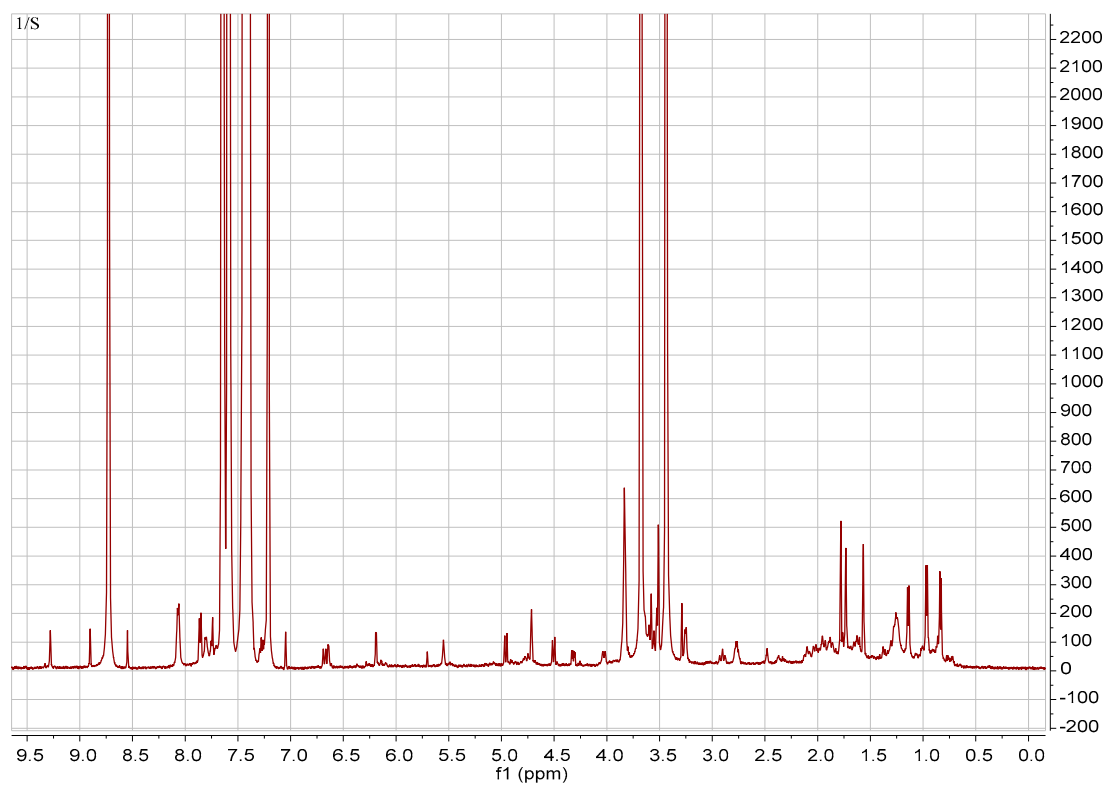

**Figure S11.** The  $^1\text{H}$  spectrum of compound **1a** in  $\text{pyridine-}d_5$

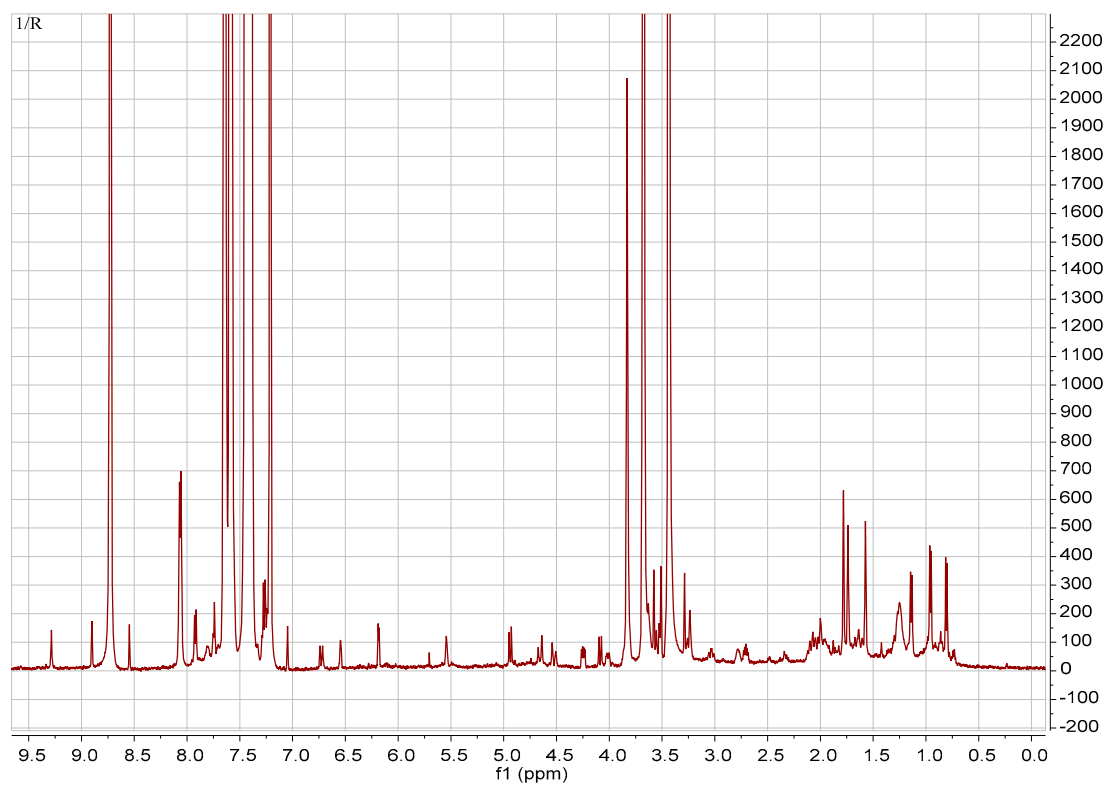

**Figure S12.** The  $^1\text{H}$  spectrum of compound **1b** in  $\text{pyridine-}d_5$



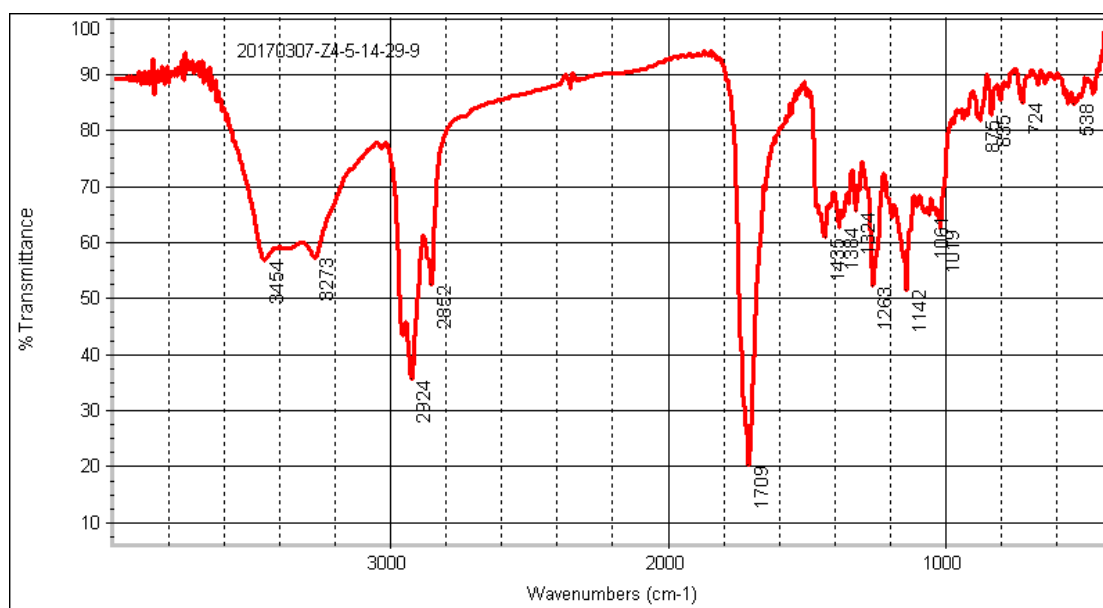

**Figure S13.** The IR spectrum of compound 2

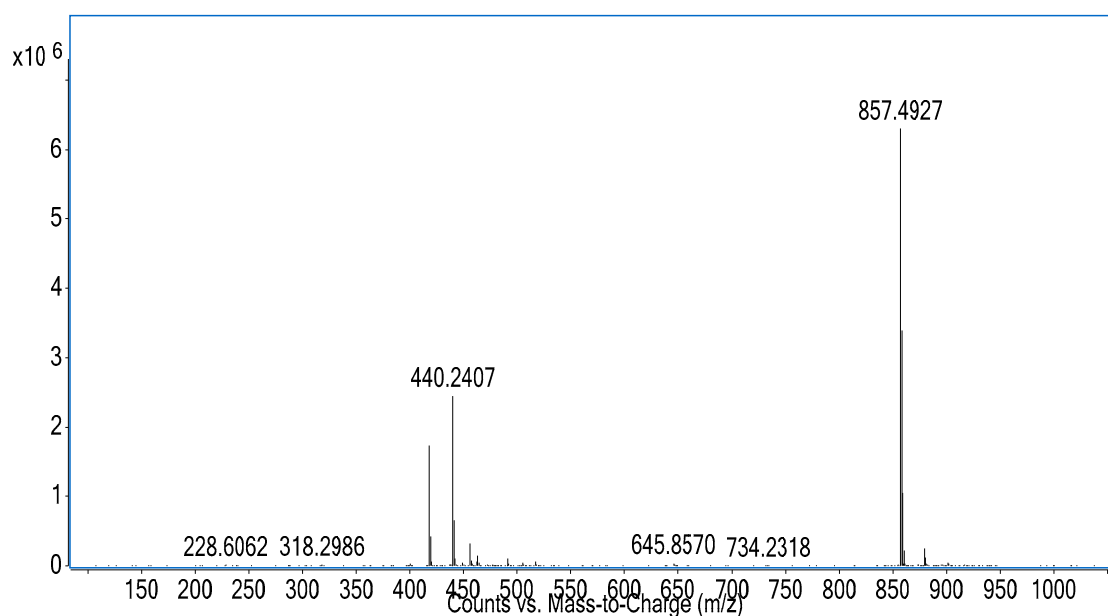

**Figure S14.** The HR-ESI-MS spectrum of compound 2

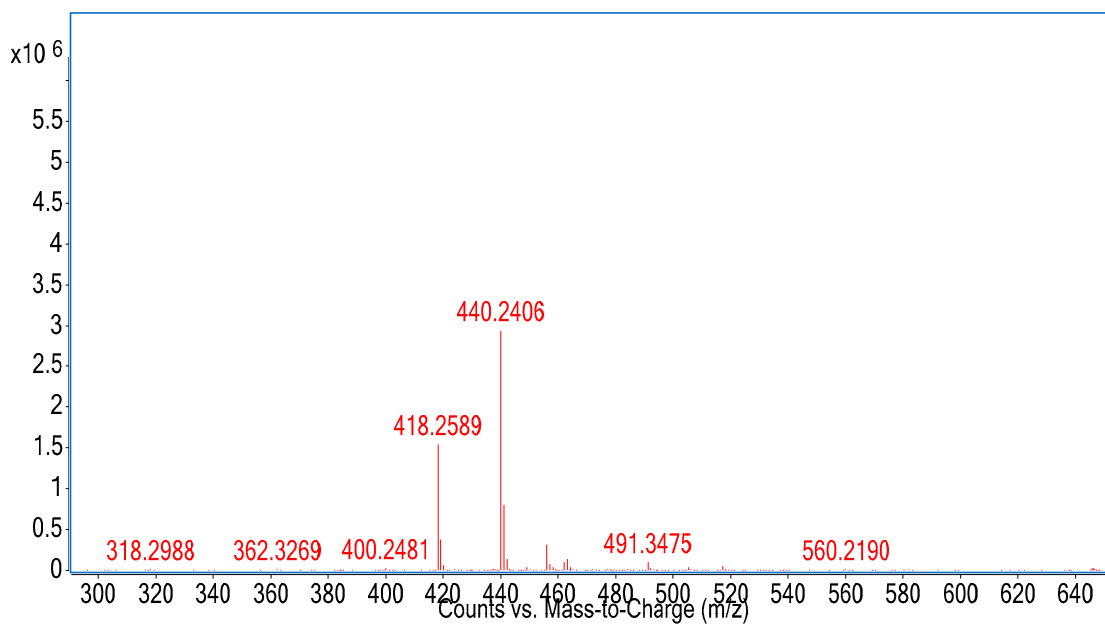

Figure S15. The HR-ESI-MS spectrum of compound 2 (expansion)

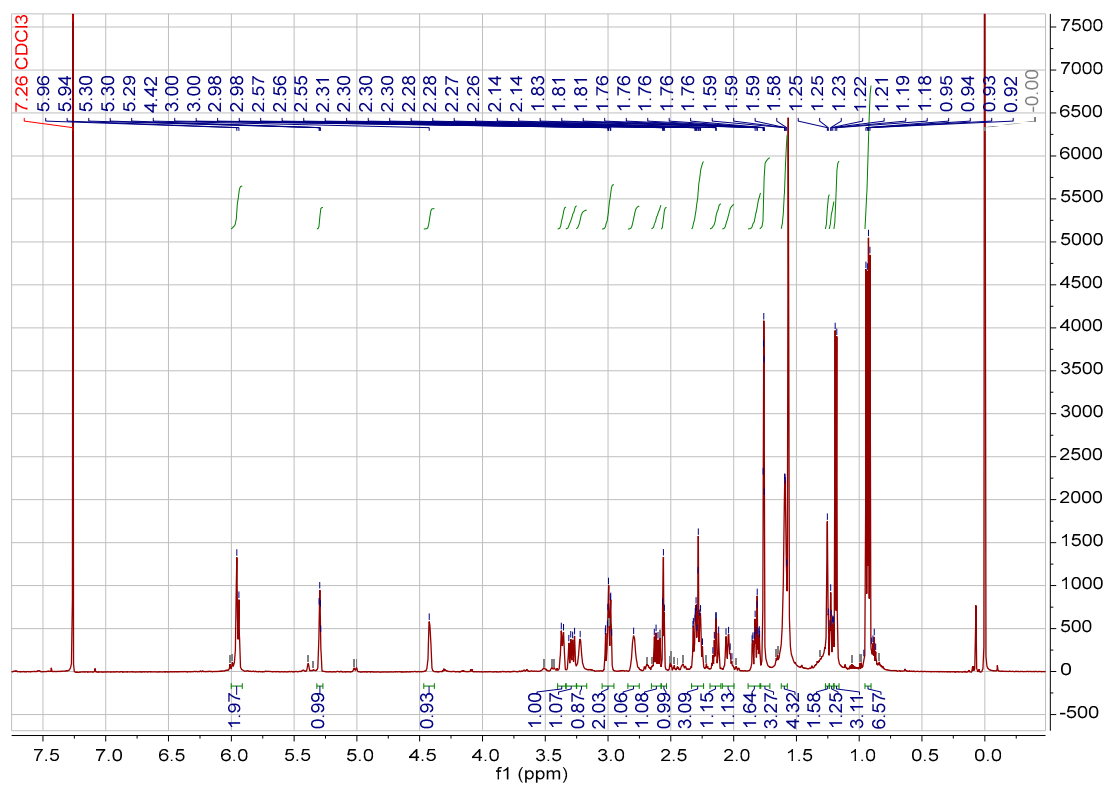

Figure S16. The <sup>1</sup>H-NMR spectrum of compound 2 in CDCl<sub>3</sub>

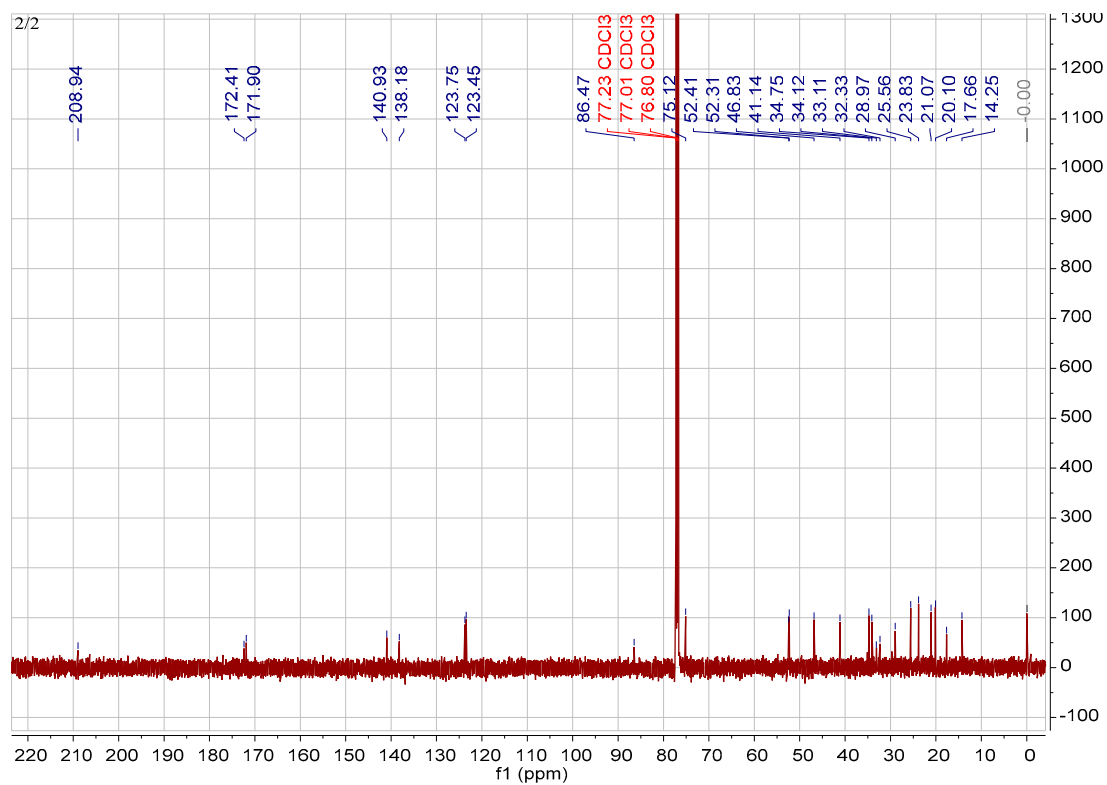

Figure S17. The  $^{13}\text{C}$ -NMR spectrum of compound **2** in  $\text{CDCl}_3$

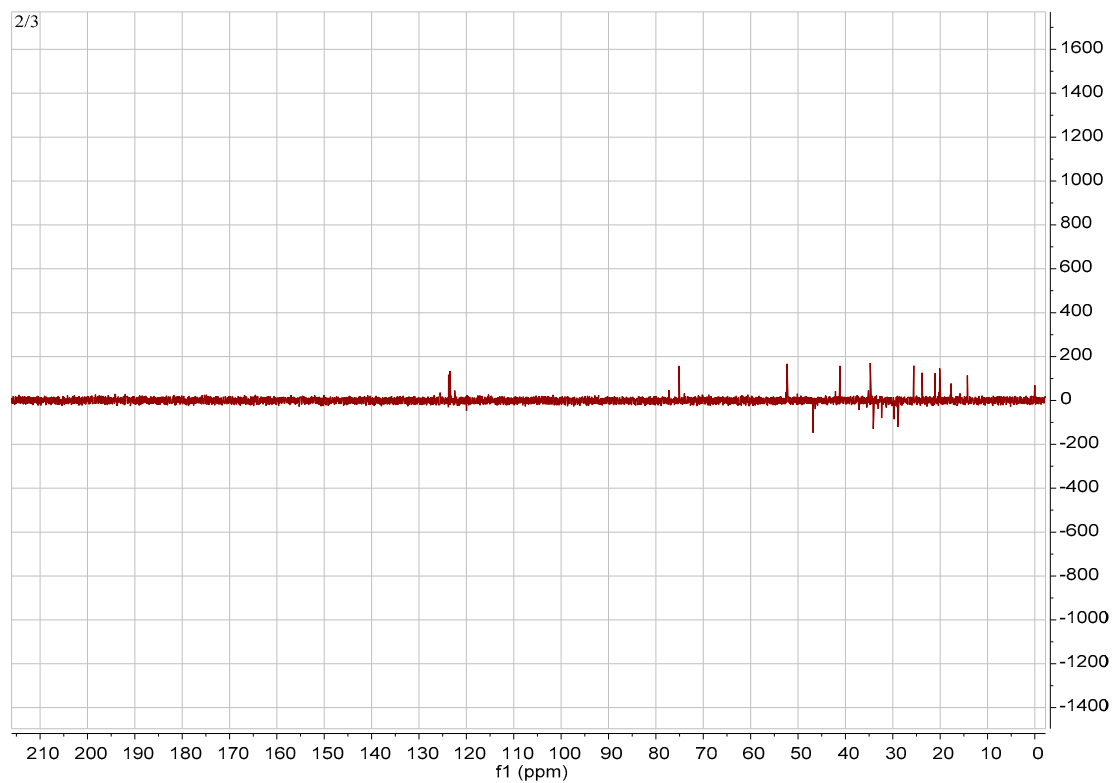

Figure S18. The DEPT spectrum of compound **2** in  $\text{CDCl}_3$

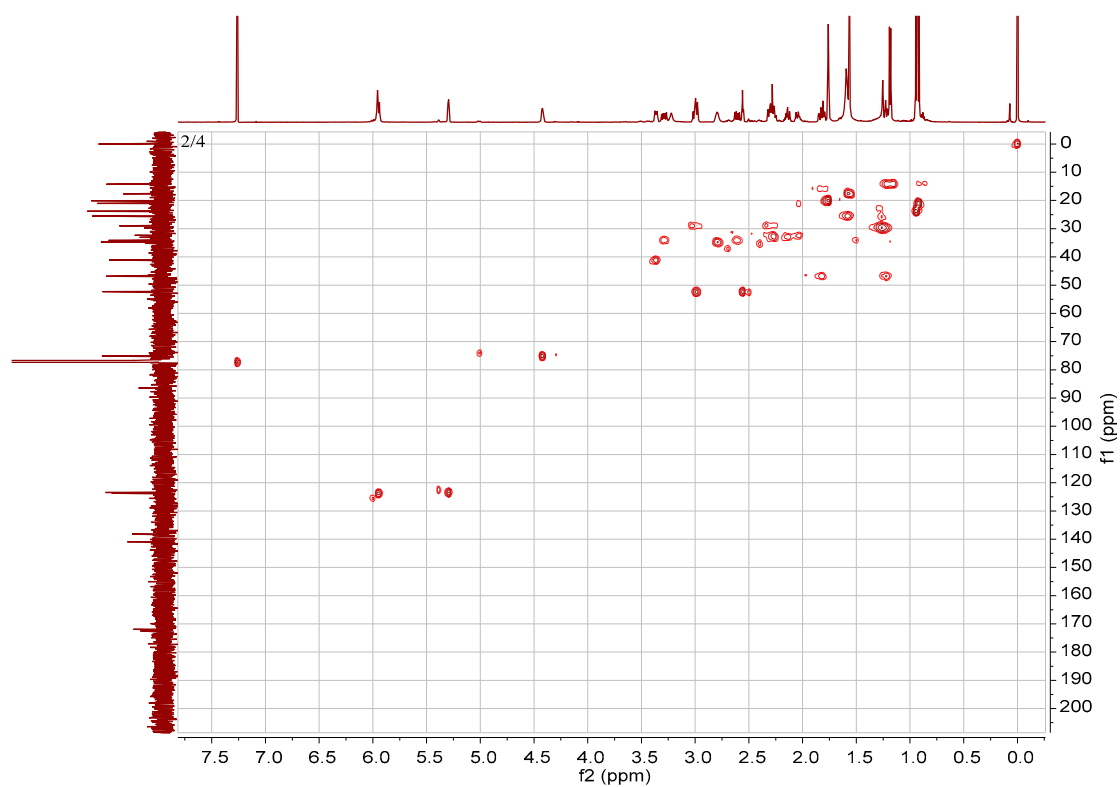

Figure S19. The HSQC spectrum of compound **2** in CDCl<sub>3</sub>

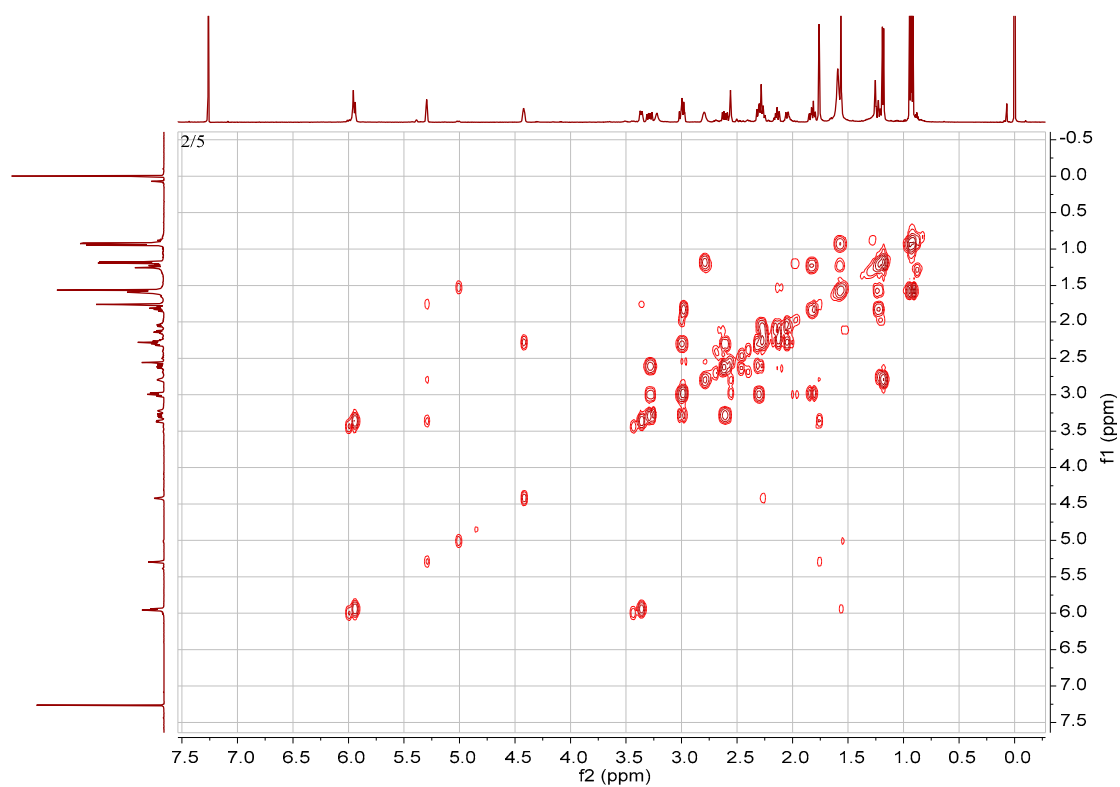

Figure S20. The <sup>1</sup>H-<sup>1</sup>H COSY spectrum of compound **2** in CDCl<sub>3</sub>

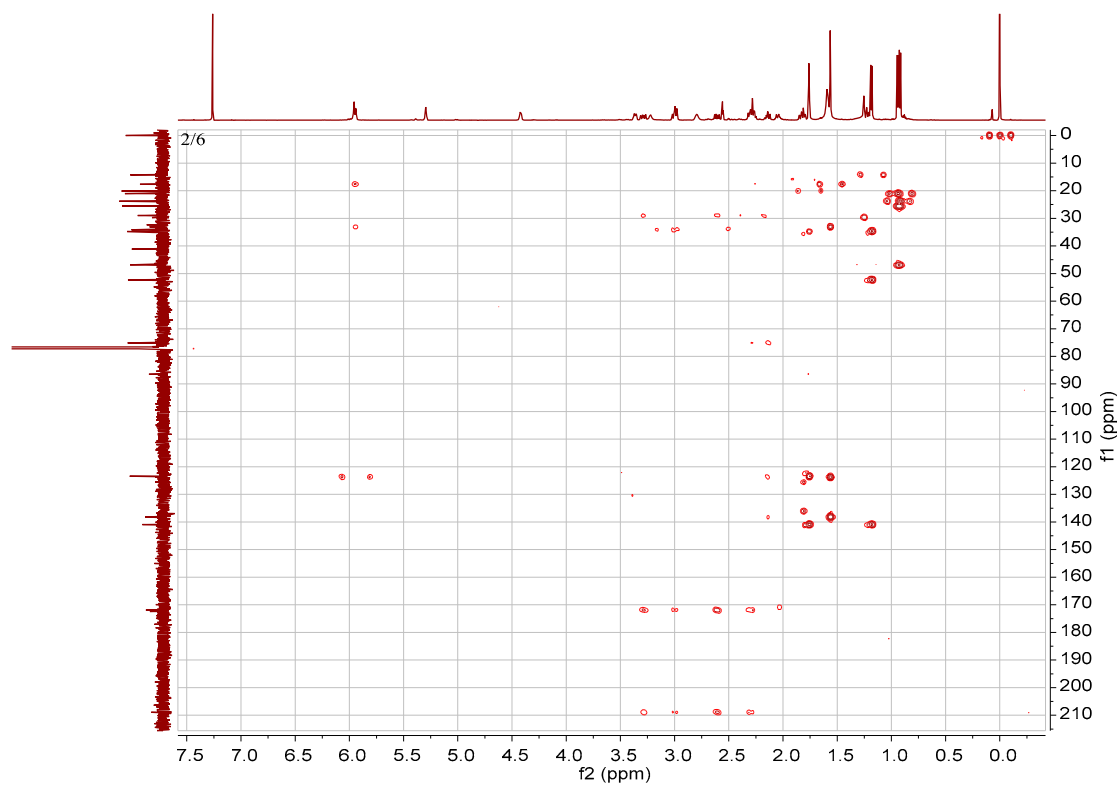

Figure S21. The HMBC spectrum of compound 2 in CDCl<sub>3</sub>

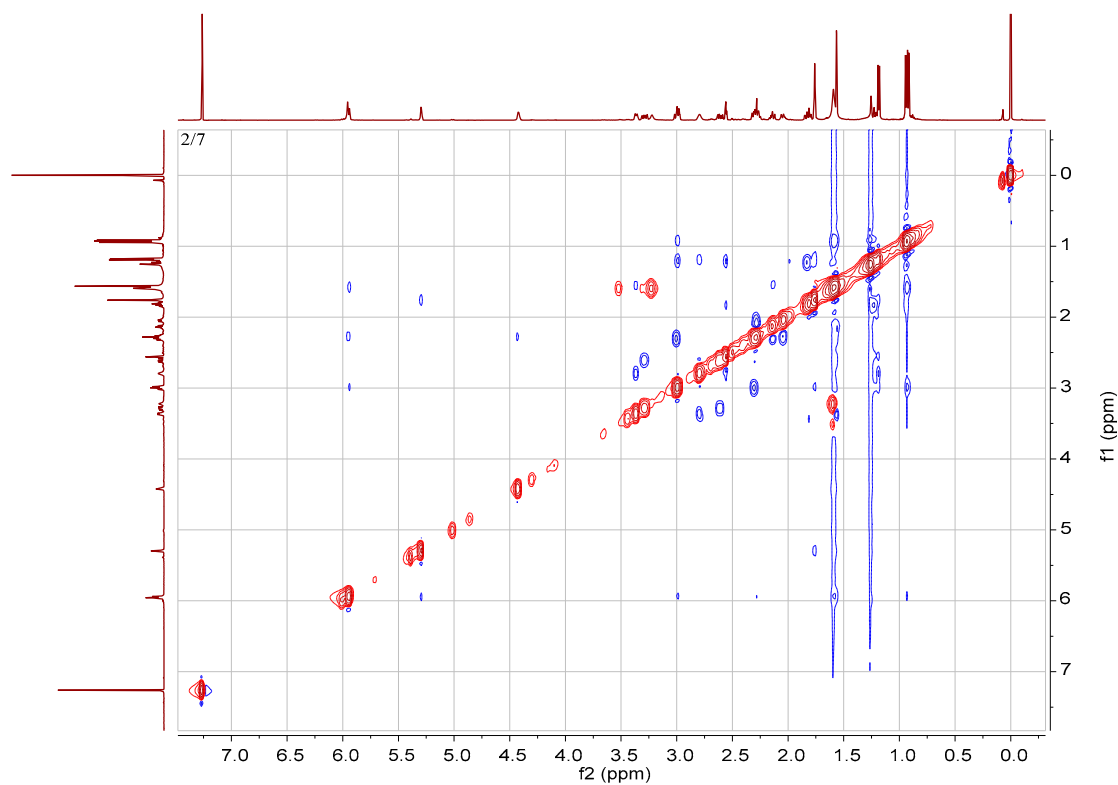

Figure S22. The NOESY spectrum of compound 2 in CDCl<sub>3</sub>

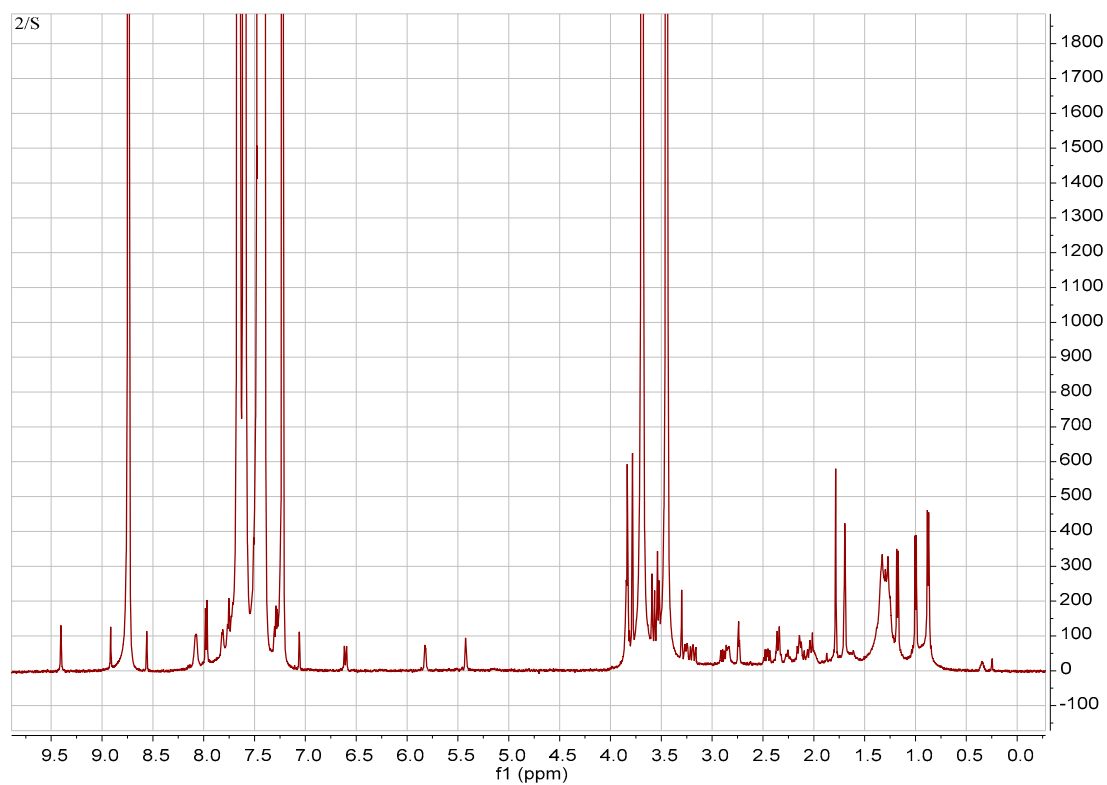

Figure S23. The  $^1\text{H}$  spectrum of compound **2a** in pyridine- $d_5$

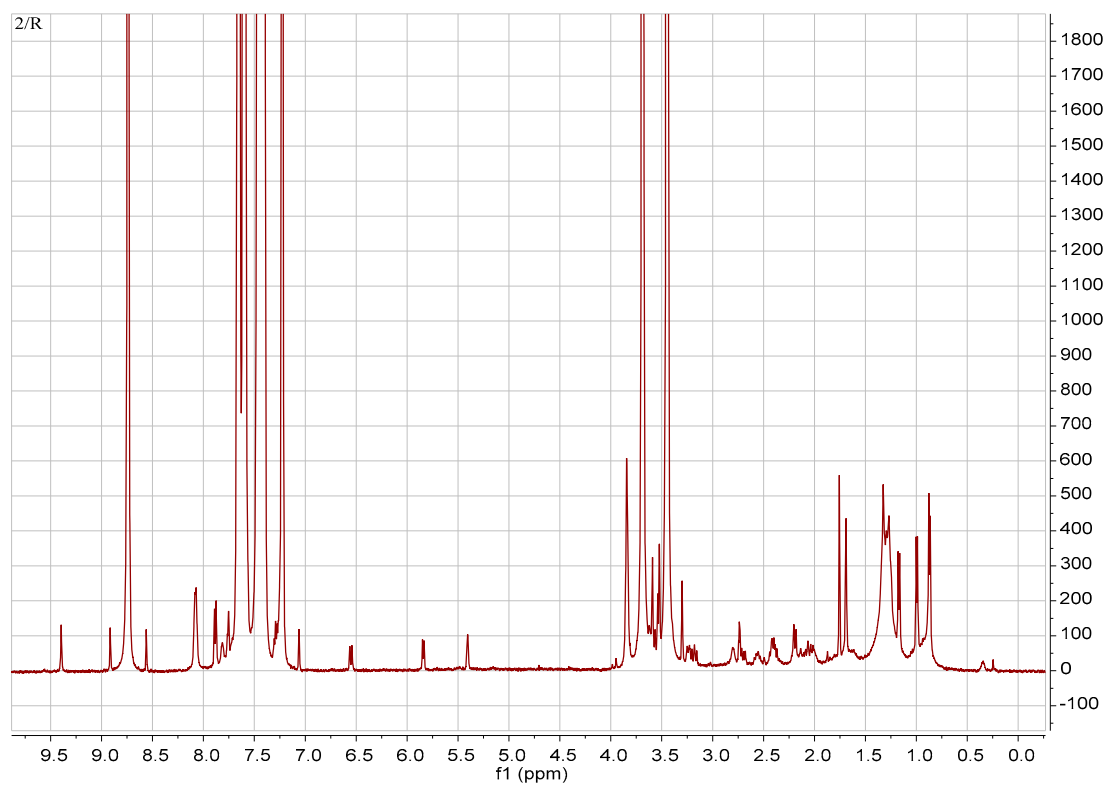

Figure S24. The  $^1\text{H}$  spectrum of compound **2b** in pyridine- $d_5$

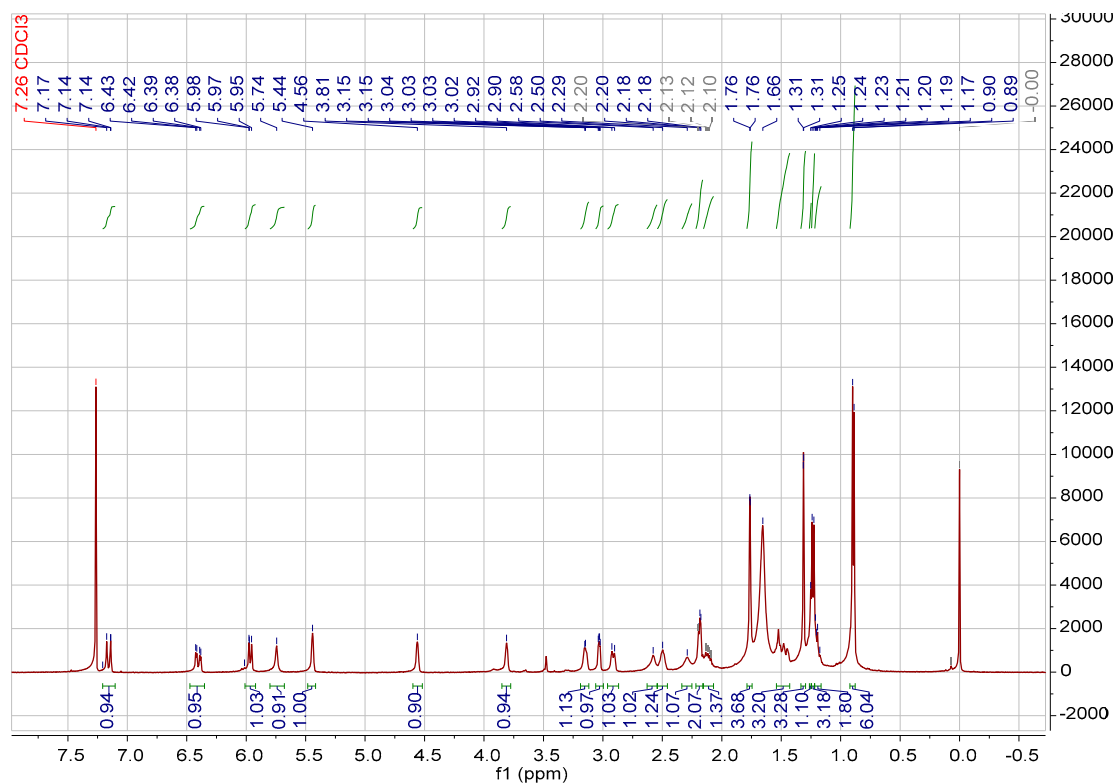

**Figure S25.** The  $^1\text{H}$ -NMR spectrum of compound **3** in  $\text{CDCl}_3$

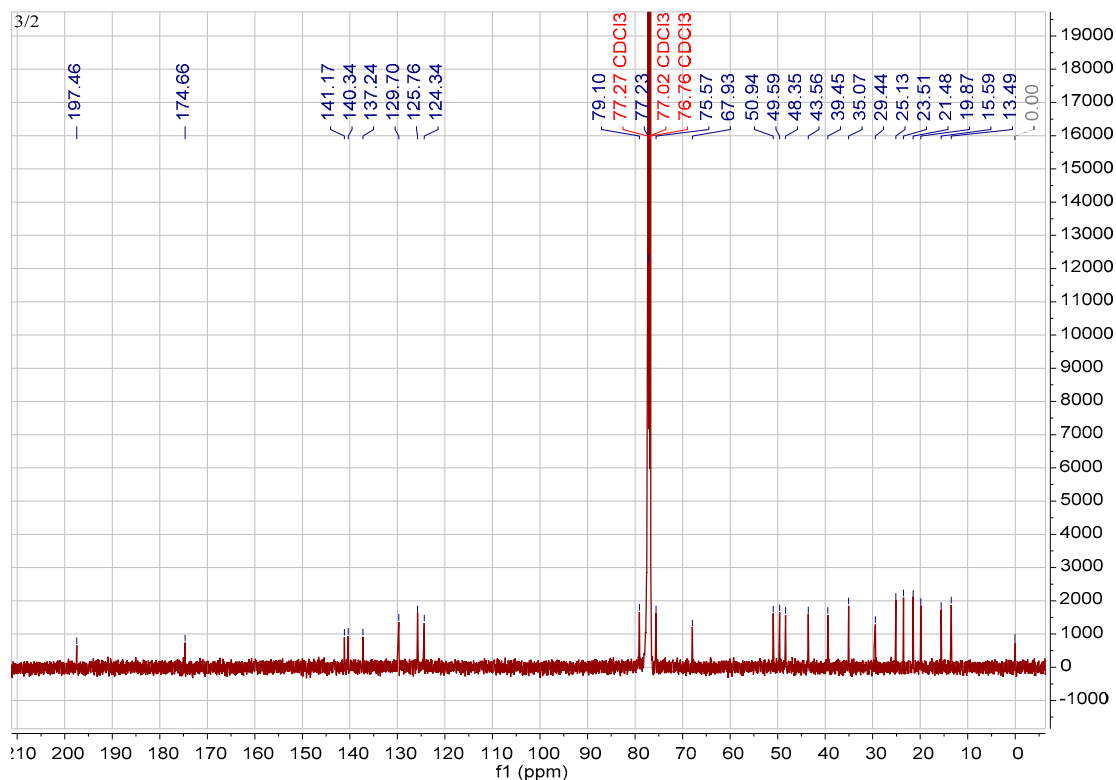

**Figure S26.** The  $^{13}\text{C}$ -NMR spectrum of compound **3** in  $\text{CDCl}_3$

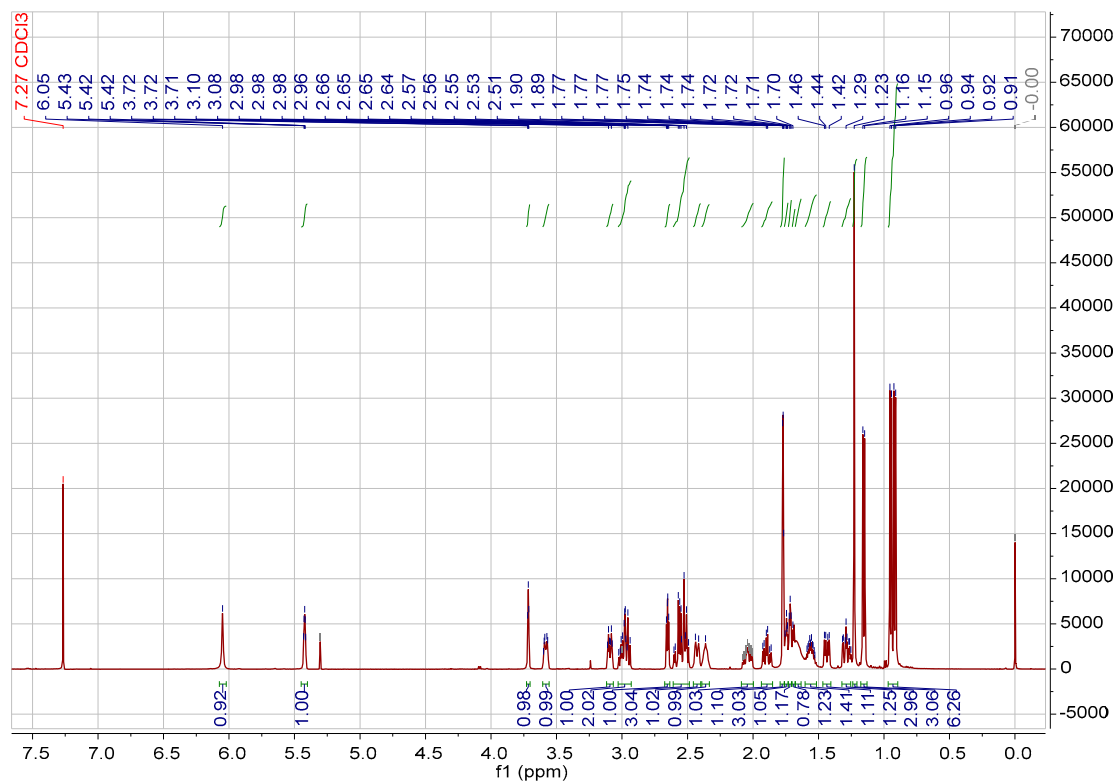

Figure S27. The  $^1\text{H}$ -NMR spectrum of compound 4 in  $\text{CDCl}_3$

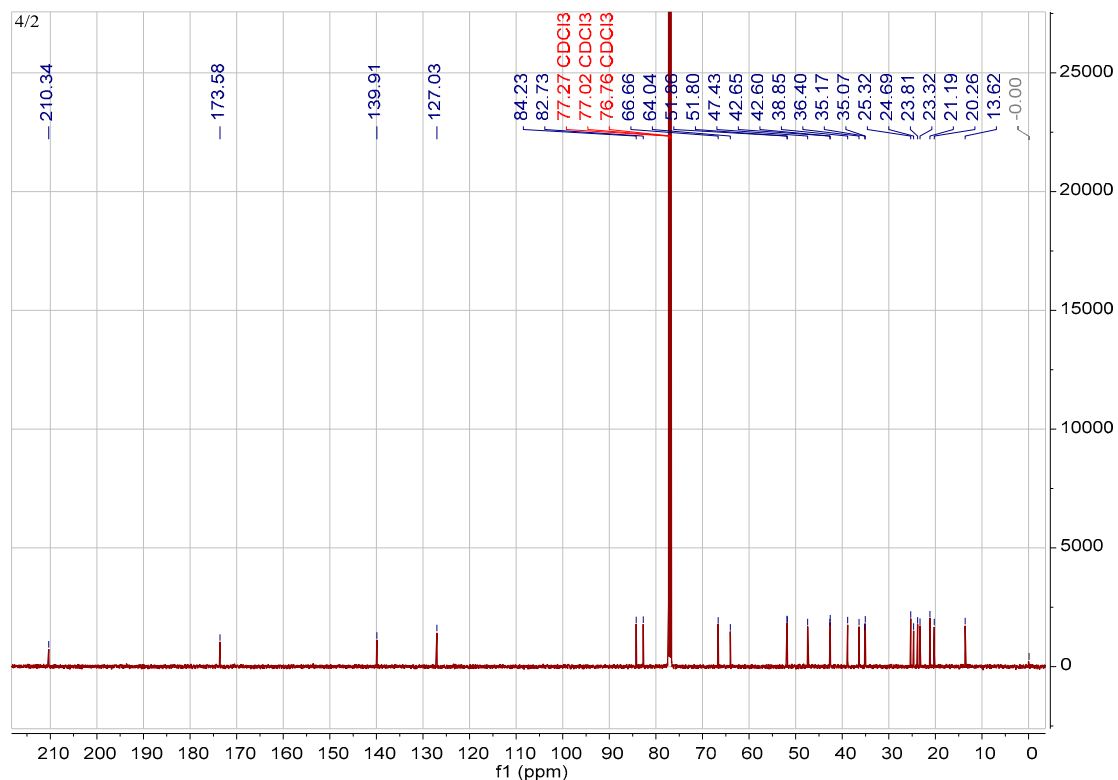

Figure S28. The  $^{13}\text{C}$ -NMR spectrum of compound 4 in  $\text{CDCl}_3$



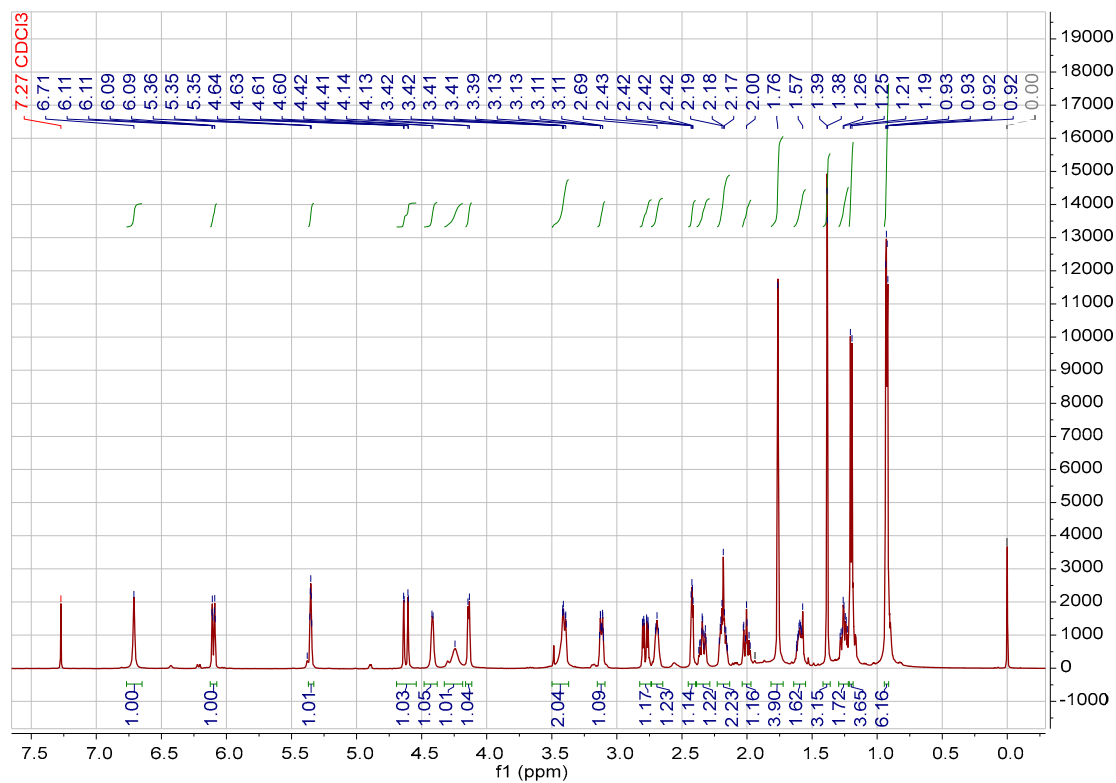

Figure S29. The  $^1\text{H-NMR}$  spectrum of compound 5 in  $\text{CDCl}_3$

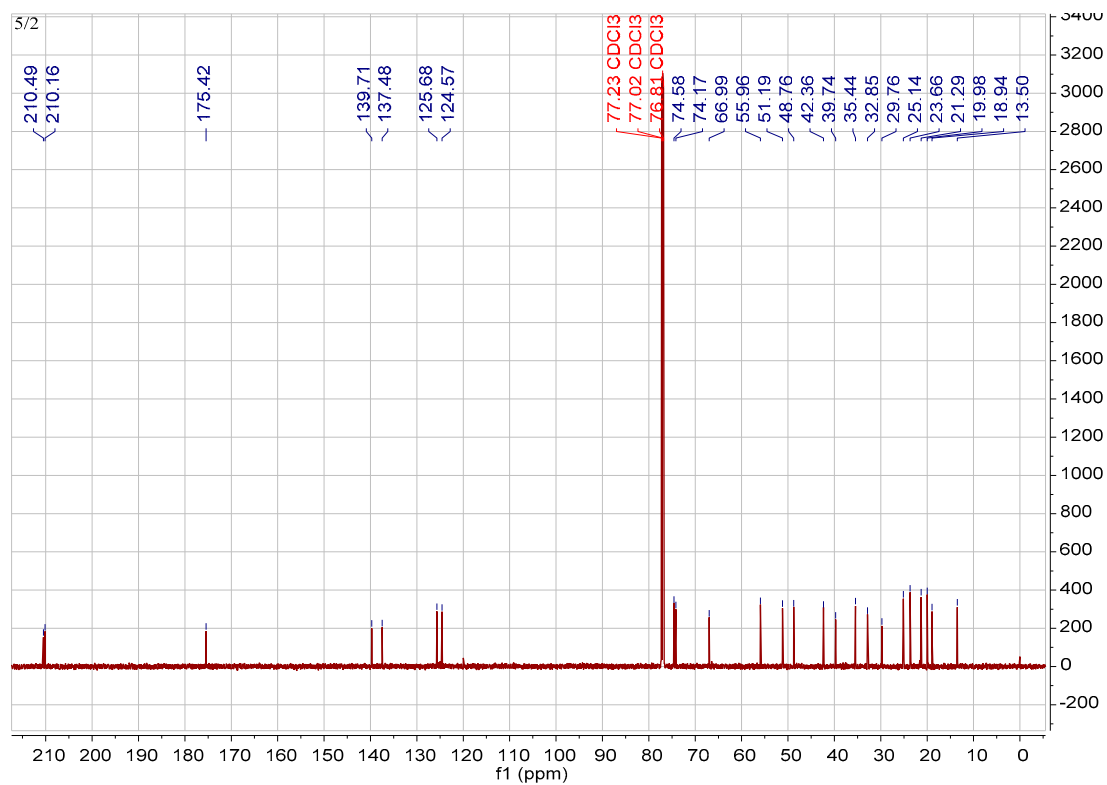

Figure S30. The  $^{13}\text{C-NMR}$  spectrum of compound 5 in  $\text{CDCl}_3$
